# Supplementary material for: The Effect of Alpha-Lipoic Acid on Mitochondrial Superoxide and Glucocorticoid-Induced Hypertension
Source: Hindawi journal article supplement (doi:10.1155/2013/517045), 2013-01-01
Supplement: f1 [file 517045.f1.zip]

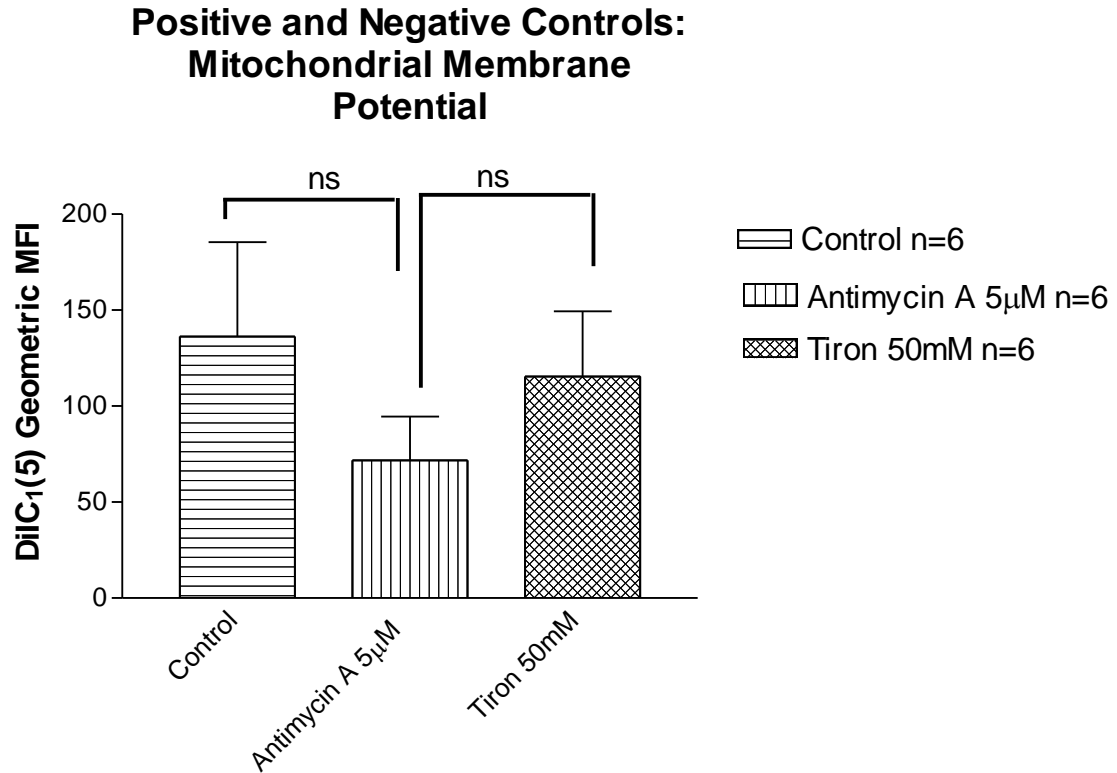

**Figure 7:** Mitochondrial membrane potential for the positive and negative controls established using Antimycin A and Tiron, respectively.

Tiron (Fluka, Steinheim, Germany), a superoxide mimetic agent, was used to lower superoxide in the mitochondria. Tiron solution (50mM) was added to the cells before the addition of mitoSOX and DiIC<sub>1</sub>(5) stains. Tiron at 50 mM resulted in significant reduction in MitoSOX geometric MFI ( $37 \pm 6$ ,  $n = 6$ ) compared to controls ( $213 \pm 27$ ,  $n = 6$ ,  $P < 0.0005$ ) (Figure 6). At this concentration, Tiron did not significantly alter mitochondrial membrane potential as represented by DiIC<sub>1</sub>(5) geometric MFI (control:  $136 \pm 49$  and Tiron:  $115 \pm 34$ ,  $n = 6$  each, *ns*) (Figure 7).
