# Supplementary material for: The Effect of Alpha-Lipoic Acid on Mitochondrial Superoxide and Glucocorticoid-Induced Hypertension
Source: Hindawi journal article supplement (doi:10.1155/2013/517045), 2013-01-01
Supplement: f1 [file 517045.f1.zip]

### Positive and Negative Controls: Mitochondrial Superoxide

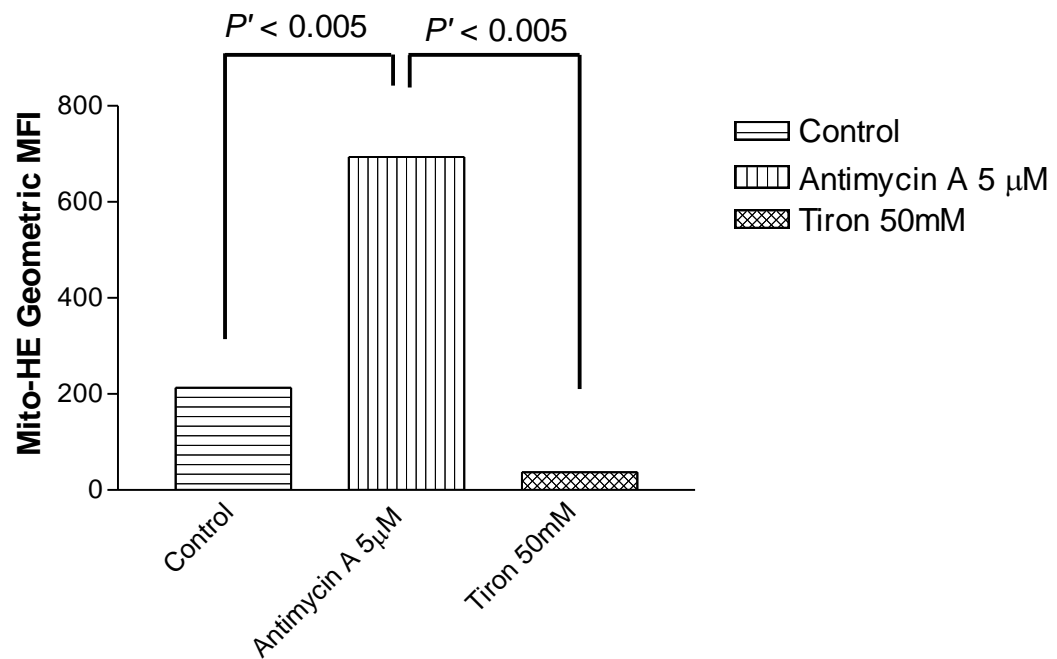

**Figure 6:** Mitochondrial superoxide availability for the positive and negative controls established using Antimycin A and Tiron, respectively.
